# Supplementary material for: Computational Screening and Experimental Validation on Multicomponent Crystals of a New Class of Janus Kinase (JAK) Inhibitor Drug with Improved Solubility
Source: MDPI journal article supplement (doi:10.3390/cryst12121722), 2022-11-27
Supplement: s1 [file s1]

## Supporting Information

### **Computational screening and experimental validation on multicomponent crystals of a new class of Janus Kinase (JAK) inhibitor drug with improved solubility**

Yujiang Xie<sup>1,2,†</sup>, Genpei Shi<sup>1,2,†</sup>, Jie Sun<sup>1,2</sup>, Si Li<sup>1,2</sup>, Wei Gao<sup>3</sup>, Yiming Hu<sup>3,\*</sup>, Chang Zu<sup>3</sup>,

Weiwei Tang<sup>1,2,\*</sup>, Junbo Gong<sup>1,2</sup>

<sup>1</sup>School of Chemical Engineering and Technology, State Key Laboratory of Chemical Engineering, The Co-Innovation Center of Chemistry and Chemical Engineering of Tianjin, Tianjin University, Tianjin 300072, China

<sup>2</sup>Haihe Laboratory of Sustainable Chemical Transformations, Tianjin 300192, China

<sup>3</sup>Jiangsu Hengrui Pharmaceuticals Co., Ltd, Lianyungang 222000, China

**Table S1.** Preparation of Multicomponent Crystal Forms

| Complex                                 | Experimental details                                                                             |
|-----------------------------------------|--------------------------------------------------------------------------------------------------|
| <b>Slurry method</b>                    |                                                                                                  |
| SHR0302-SAL                             | SHR0302:41.4mg; SAL: 13.8mg; isopropyl acetate:2mL                                               |
|                                         | SHR0302:41.4mg; SAL: 13.8mg; isopropanol:2mL                                                     |
|                                         | SHR0302:41.4mg; SAL: 13.8mg; acetonitrile:2mL                                                    |
|                                         | SHR0302:41.4mg; SAL: 13.8mg; dichloromethane-ethanol (volume ratio 12:1):2mL                     |
|                                         | SHR0302:41.4mg; SAL: 13.8mg; dichloromethane:2mL                                                 |
| <b>Solvent-assisted grinding method</b> |                                                                                                  |
|                                         | SHR0302:414mg; SAL:138mg; ethanol/methanol/acetonitrile/acetone/dichloromethane: 50 $\mu$ L      |
| <b>Slurry method</b>                    |                                                                                                  |
| SHR0302-CA                              | SHR0302:41.4mg; SAL: 19.2mg; isobutanol:2mL                                                      |
|                                         | SHR0302:41.4mg; SAL: 19.2mg; dichloromethane-methanol (volume ratio 12:3) :2mL                   |
|                                         | SHR0302:41.4mg; SAL: 19.2mg; acetonitrile:2mL                                                    |
|                                         | SHR0302:41.4mg; SAL: 19.2mg; dichloromethane-ethanol (volume ratio 12:1):2mL                     |
|                                         | SHR0302:41.4mg; SAL: 19.2mg; methyl tert-butyl ether:2mL                                         |
|                                         | SHR0302:41.4mg; SAL: 19.2mg; dichloromethane-isopropyl alcohol (volume ratio 8:2):2mL            |
| <b>Solvent-assisted grinding method</b> |                                                                                                  |
|                                         | SHR0302:414mg; SAL:138mg; ethanol/methanol/acetonitrile/acetone/dichloromethane: 50 $\mu$ L      |
| <b>Slurry method</b>                    |                                                                                                  |
| SHR0302-26DHBA                          | SHR0302:41.4mg; 26DHBA:15.4mg; isobutanol:2mL                                                    |
|                                         | SHR0302:41.4mg; 26DHBA:15.4mg; dichloromethane:2mL                                               |
| <b>Solvent-assisted grinding method</b> |                                                                                                  |
|                                         | SHR0302:414mg;26DHBA:154mg;<br>ethanol/methanol/acetonitrile/acetone/dichloromethane: 50 $\mu$ L |

**Table S2.** COSMO-RS Calculation and MC Analysis Results of SHR0302 with Coformers

|    | Coformer                         | $\Delta H_{\text{ex}}$ (kcal/mol) | Hit Rate(%) | New form |
|----|----------------------------------|-----------------------------------|-------------|----------|
| 1  | oxalic acid                      | -10.00                            | 0           | Yes      |
| 2  | phloroglucinol                   | -9.24                             | 0           |          |
| 3  | gallic acid                      | -8.82                             | 0           |          |
| 4  | fumaric acid                     | -8.56                             | 100         |          |
| 5  | 2,4-dihydroxybenzoic acid        | -8.38                             | 0           |          |
| 6  | <b>citric acid</b>               | -8.05                             | 0           | Yes      |
| 7  | tartaric acid                    | -7.87                             | 100         | Yes      |
| 8  | 2,5-dihydroxybenzoic acid        | -7.78                             | 0           | Yes      |
| 9  | 2,7-dihydroxynaphthalene         | -7.20                             | 0           |          |
| 10 | 2,6-dihydroxynaphthalene         | -7.15                             | 0           |          |
| 11 | p-toluenesulfonic acid           | -7.11                             | 100         |          |
| 12 | pyrogallol                       | -7.05                             | 0           |          |
| 13 | resorcinol                       | -6.90                             | 0           |          |
| 14 | 3-hydroxybenzoic acid            | -6.50                             | 0           |          |
| 15 | catechol                         | -6.47                             | 0           |          |
| 16 | maleic acid                      | -6.24                             | 100         |          |
| 17 | 4-hydroxybenzoic acid            | -6.14                             | 100         |          |
| 18 | vanillic acid                    | -6.00                             | 0           |          |
| 19 | hydroquinone                     | -5.76                             | 0           |          |
| 20 | <b>2,6-dihydroxybenzoic acid</b> | -5.35                             | 0           | Yes      |
| 21 | <b>salicylic acid</b>            | -5.11                             | 0           | Yes      |
| 22 | succinic acid                    | -4.97                             | 100         |          |
| 23 | L-hydroxybutanedioic acid        | -4.87                             | 100         |          |
| 24 | malonic acid                     | -4.53                             | 100         |          |
| 25 | glutaric acid                    | -4.46                             | 100         |          |
| 26 | ferulic acid                     | -4.18                             | 100         |          |
| 27 | 4-aminosalicylic acid            | -3.69                             | 0           |          |
| 28 | m-aminobenzoic acid              | -3.67                             | 0           |          |
| 29 | benzoic acid                     | -3.57                             | 100         |          |
| 30 | acetylsalicylic acid             | -3.52                             | 0           |          |
| 31 | p-aminobenzoic acid              | -2.58                             | 100         |          |
| 32 | nicotinic acid                   | -2.48                             | 100         |          |

|    |               |       |     |
|----|---------------|-------|-----|
| 33 | acetaminophen | -2.12 | 100 |
| 34 | glycine       | -1.18 | 0   |
| 35 | saccharin     | -0.73 | 0   |
| 36 | histidine     | -0.68 | 100 |
| 37 | piperazine    | -0.49 | 0   |
| 38 | proline       | -0.39 | 0   |
| 39 | theophylline  | -0.17 | 0   |
| 40 | isoniazid     | -0.04 | 0   |
| 41 | adipic acid   | 0.04  | 100 |
| 42 | caffeine      | 0.09  | 0   |

---

**Table S3.** Data of TPR, FPR and Youden Index Used in Prediction Performance Evaluation

|    | Coformer                         | $\Delta H_{\text{ex}}$ (kcal/mol) | TPR         | FPR         | Youden index |
|----|----------------------------------|-----------------------------------|-------------|-------------|--------------|
| 1  | Oxalic acid                      | -10.00                            | 0.17        | 0.00        | 0.17         |
| 2  | Phloroglucinol                   | -9.24                             | 0.17        | 0.03        | 0.14         |
| 3  | Gallic acid                      | -8.82                             | 0.17        | 0.06        | 0.11         |
| 4  | Fumaric acid                     | -8.56                             | 0.17        | 0.08        | 0.09         |
| 5  | 2,4-Dihydroxybenzoic acid        | -8.38                             | 0.17        | 0.11        | 0.06         |
| 6  | <b>citric acid</b>               | -8.05                             | 0.33        | 0.11        | 0.22         |
| 7  | tartaric acid                    | -7.87                             | 0.50        | 0.11        | 0.39         |
| 8  | 2,5-Dihydroxybenzoic acid        | -7.78                             | 0.67        | 0.11        | 0.56         |
| 9  | 2,7-Dihydroxynaphthalene         | -7.20                             | 0.67        | 0.14        | 0.53         |
| 10 | 2,6-Dihydroxynaphthalene         | -7.15                             | 0.67        | 0.17        | 0.50         |
| 11 | p-toluenesulfonic acid           | -7.11                             | 0.67        | 0.19        | 0.48         |
| 12 | pyrogallol                       | -7.05                             | 0.67        | 0.22        | 0.45         |
| 13 | resorcinol                       | -6.90                             | 0.67        | 0.25        | 0.42         |
| 14 | 3-hydroxybenzoic acid            | -6.50                             | 0.67        | 0.28        | 0.39         |
| 15 | catechol                         | -6.47                             | 0.67        | 0.31        | 0.36         |
| 16 | maleic acid                      | -6.24                             | 0.67        | 0.33        | 0.34         |
| 17 | 4-hydroxybenzoic acid            | -6.14                             | 0.67        | 0.36        | 0.31         |
| 18 | vanillic acid                    | -6.00                             | 0.67        | 0.39        | 0.28         |
| 19 | hydroquinone                     | -5.76                             | 0.67        | 0.42        | 0.25         |
| 20 | <b>2,6-dihydroxybenzoic acid</b> | -5.35                             | 0.83        | 0.42        | 0.41         |
| 21 | <b>salicylic acid</b>            | <b>-5.11</b>                      | <b>1.00</b> | <b>0.42</b> | <b>0.58</b>  |
| 22 | succinic acid                    | -4.97                             | 1.00        | 0.44        | 0.56         |
| 23 | L-hydroxybutanedioic acid        | -4.87                             | 1.00        | 0.47        | 0.53         |
| 24 | malonic acid                     | -4.53                             | 1.00        | 0.50        | 0.50         |
| 25 | glutaric acid                    | -4.46                             | 1.00        | 0.53        | 0.47         |
| 26 | ferulic acid                     | -4.18                             | 1.00        | 0.56        | 0.44         |
| 27 | 4-aminosalicylic acid            | -3.69                             | 1.00        | 0.58        | 0.42         |
| 28 | m-aminobenzoic acid              | -3.67                             | 1.00        | 0.61        | 0.39         |
| 29 | benzoic acid                     | -3.57                             | 1.00        | 0.64        | 0.36         |
| 30 | acetylsalicylic acid             | -3.52                             | 1.00        | 0.67        | 0.33         |
| 31 | p-aminobenzoic acid              | -2.58                             | 1.00        | 0.69        | 0.31         |
| 32 | nicotinic acid                   | -2.48                             | 1.00        | 0.72        | 0.28         |

|    |               |       |      |      |      |
|----|---------------|-------|------|------|------|
| 33 | acetaminophen | -2.12 | 1.00 | 0.75 | 0.25 |
| 34 | glycine       | -1.18 | 1.00 | 0.78 | 0.22 |
| 35 | saccharin     | -0.73 | 1.00 | 0.81 | 0.19 |
| 36 | histidine     | -0.68 | 1.00 | 0.83 | 0.17 |
| 37 | piperazine    | -0.49 | 1.00 | 0.86 | 0.14 |
| 38 | proline       | -0.39 | 1.00 | 0.89 | 0.11 |
| 39 | theophylline  | -0.17 | 1.00 | 0.92 | 0.08 |
| 40 | isoniazid     | -0.04 | 1.00 | 0.94 | 0.06 |
| 41 | adipic acid   | 0.04  | 1.00 | 0.97 | 0.03 |
| 42 | caffeine      | 0.09  | 1.00 | 1.00 | 0.00 |

---

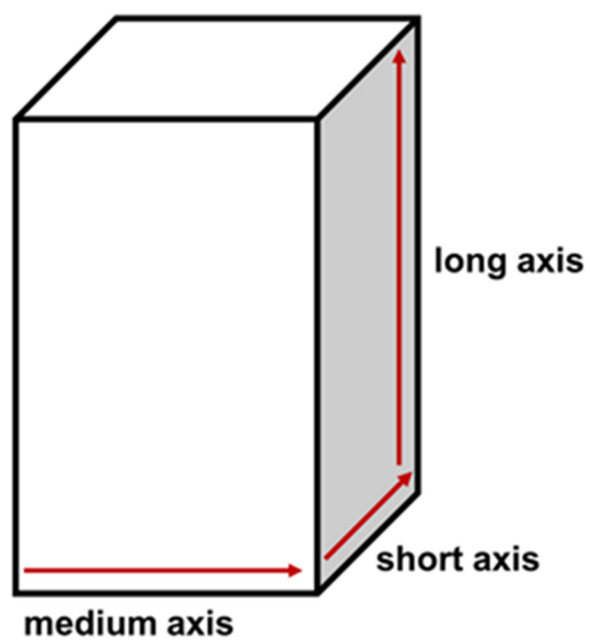

**Figure S1.** Molecular bounding box model with three unequal dimensions

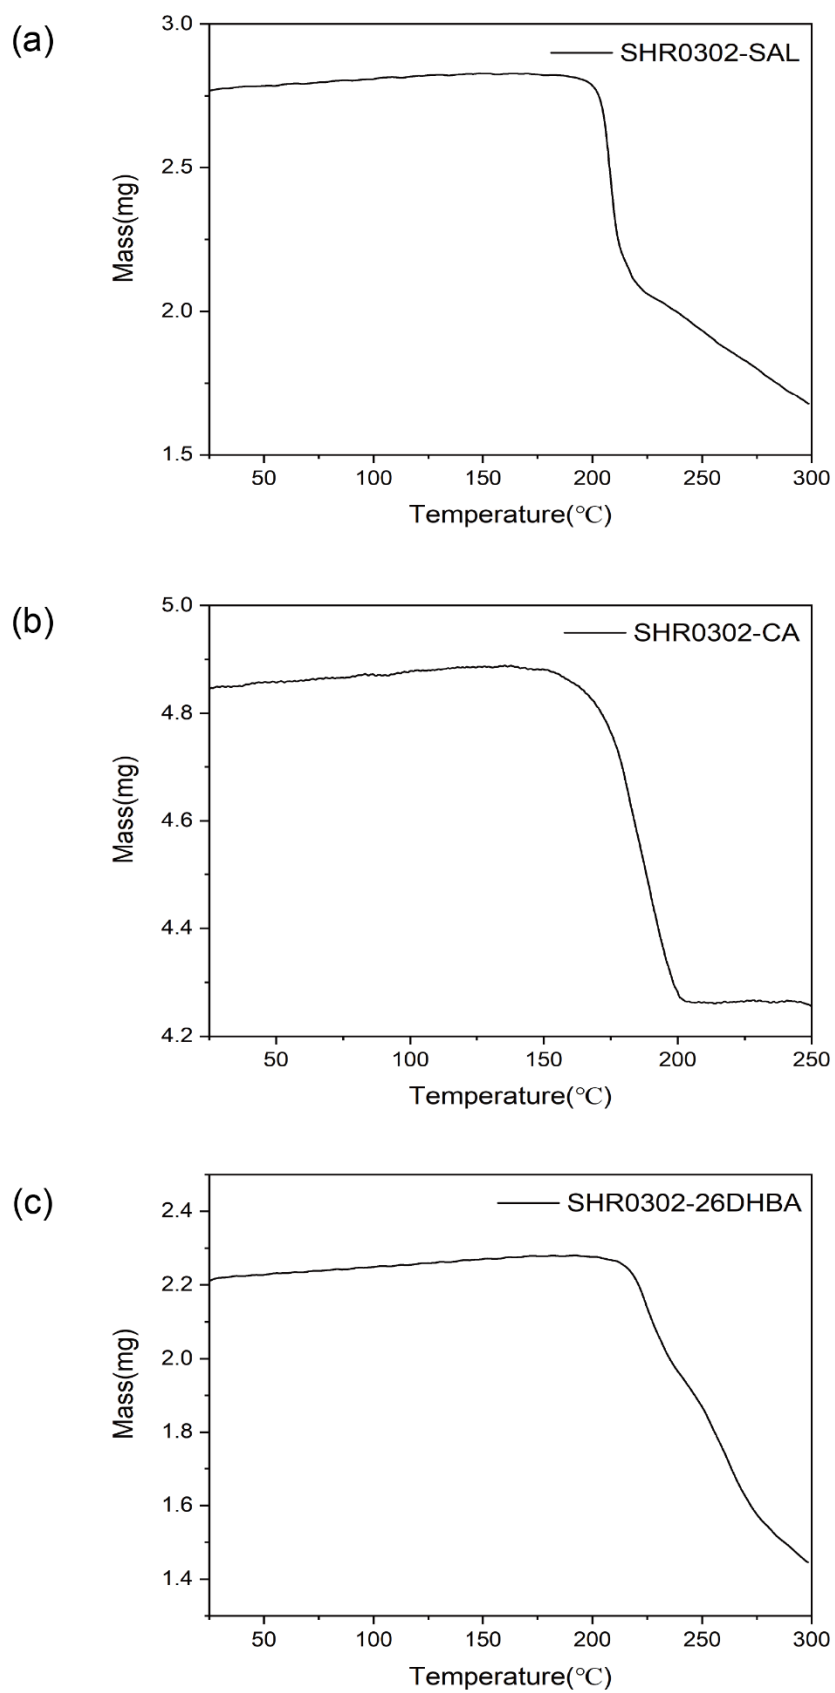

**Figure S2.** TGA curves of SHR0302-SAL (a), SHR0302-CA (b), and SHR0302-26DHBA (c) multicomponent crystal forms



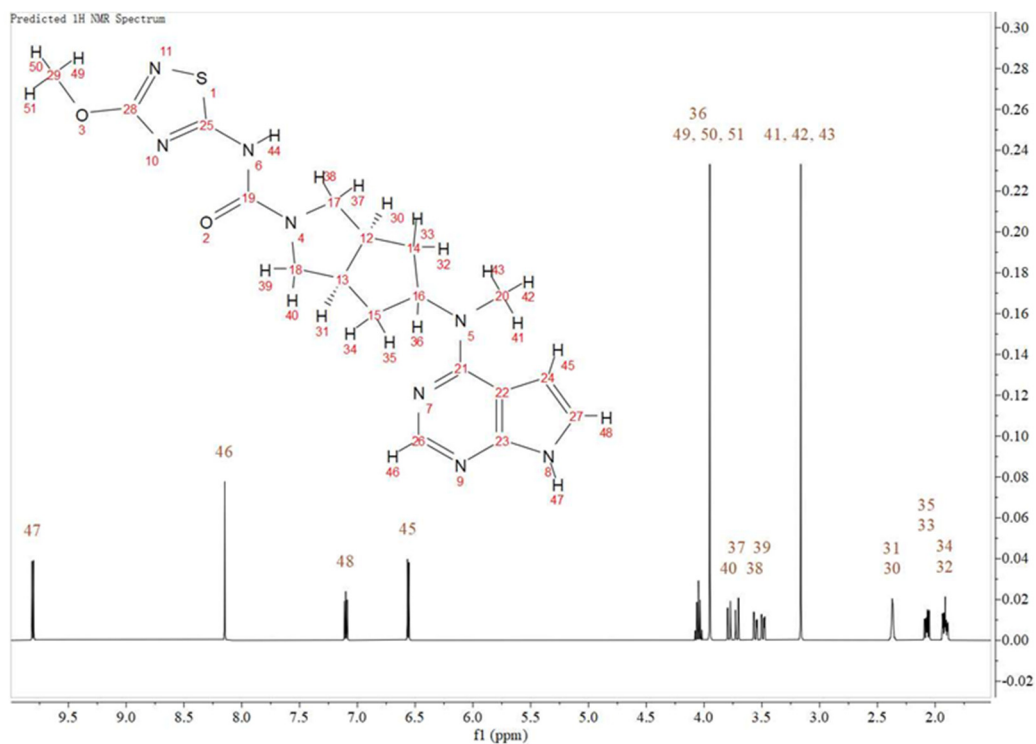

**Figure S3.** The predicted hydrogen spectrum of SHR0302 with proton assignments

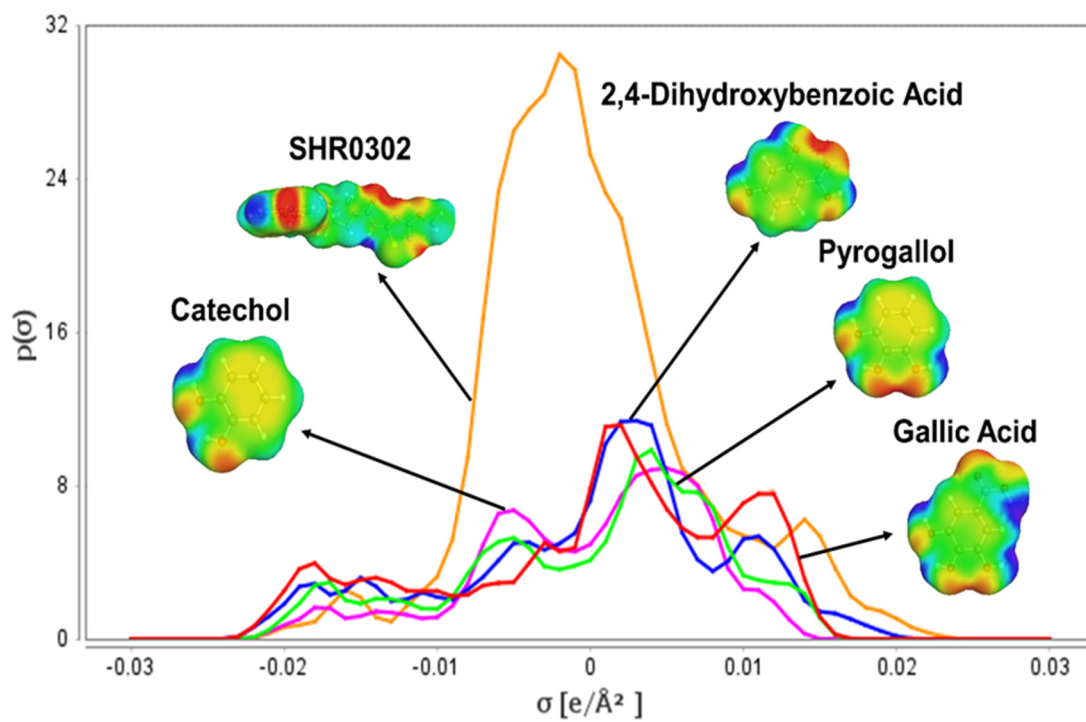

**Figure S4.**  $\sigma$ -profiles of SHR0302 and representative coformers that cannot form new multicomponent crystal with SHR0302.
